# Supplementary material for: Unveiling community patterns and trophic niches of tropical and temperate ants using an integrative framework of field data, stable isotopes and fatty acids
Source: PubMed Central journal article supplement (PMC6109374; doi:10.7717/peerj.5467), 2018-08-22

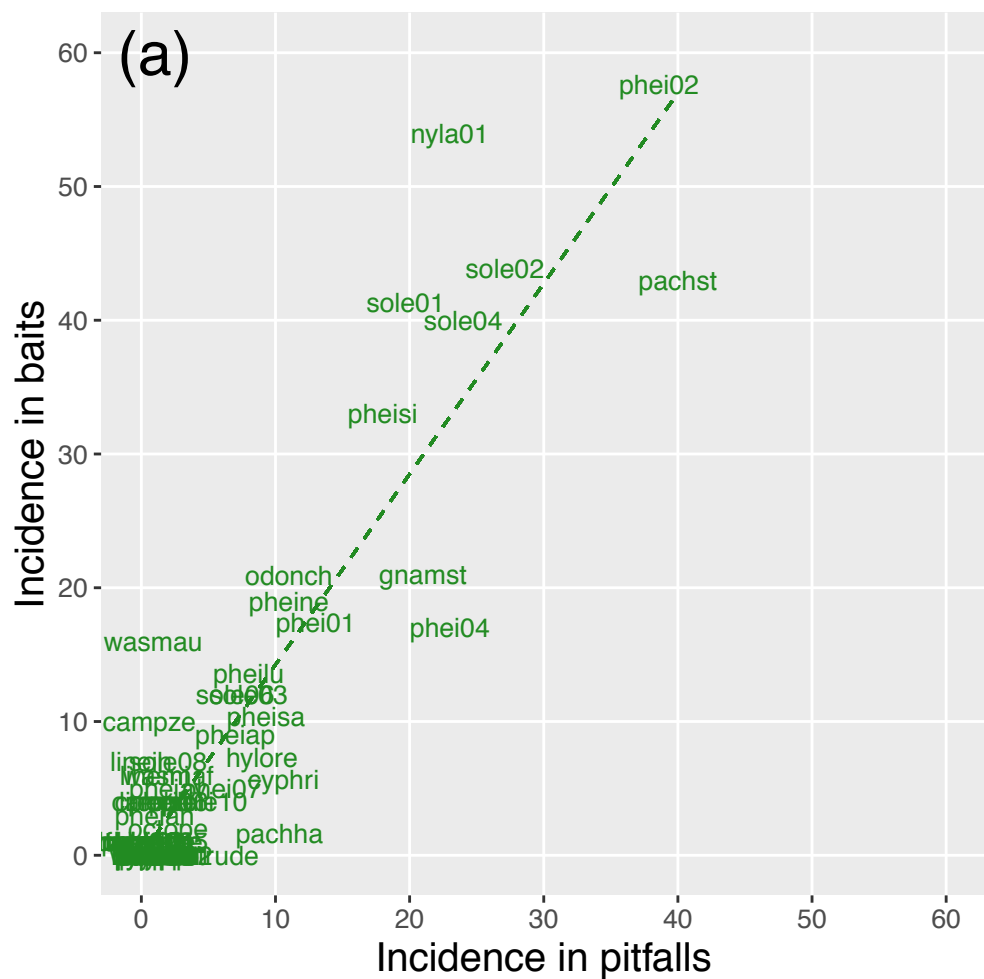

Supplement: peerj-06-5467-s002.pdf [file peerj-06-5467-s002.pdf]
