# Supplementary material for: Unveiling community patterns and trophic niches of tropical and temperate ants using an integrative framework of field data, stable isotopes and fatty acids
Source: PubMed Central journal article supplement (PMC6109374; doi:10.7717/peerj.5467), 2018-08-22
Supplement: peerj-06-5467-s003.pdf [file peerj-06-5467-s003.pdf]

## Incidence of species recorded in this work and labels used in plots.

| Species                                           | IB | IP | Label  | Species                                             | IB | IP | Labels |
|---------------------------------------------------|----|----|--------|-----------------------------------------------------|----|----|--------|
| <b>Brazil</b>                                     |    |    |        |                                                     |    |    |        |
| <i>Acanthognathus brevicornis</i> Smith, 1944     | -  | -  | acanbr | <i>Pheidole schmalzi</i> Emery, 1894                | -  | 1  | pheisc |
| <i>Acanthognathus ocellatus</i> Mayr, 1887        | -  | -  | acanoc | <i>Pheidole sigillata</i> Wilson, 2003              | 33 | 18 | pheisi |
| <i>Acromyrmex aspersus</i> (Smith, 1858)          | 1  | -  | acroas | <i>Pheidole</i> sp.1                                | 18 | 13 | phei01 |
| <i>Acromyrmex laticeps</i> (Emery, 1905)          | -  | -  | acrola | <i>Pheidole</i> sp.2                                | 57 | 38 | phei02 |
| <i>Acromyrmex lundii</i> (Guérin-Méneville, 1838) | -  | -  | acrolu | <i>Pheidole</i> sp.4                                | 17 | 23 | phei04 |
| <i>Acromyrmex subterraneus</i> (Forel, 1893)      | -  | -  | acrosu | <i>Pheidole</i> sp.5                                | 1  | 2  | phei05 |
| <i>Apterostygma acre</i> Latkke 1997              | 1  | -  | apteac | <i>Pheidole</i> sp.6                                | 4  | 2  | phei06 |
| <i>Azteca</i> sp.1                                | -  | 1  | azte01 | <i>Pheidole</i> sp.7                                | 5  | 6  | phei07 |
| <i>Azteca</i> sp.2                                | -  | -  | azte02 | <i>Pheidole</i> sp.8                                | -  | 1  | phei08 |
| <i>Brachymyrmex</i> sp.1                          | 2  | 1  | brac01 | <i>Pheidole</i> sp.9                                | -  | 1  | phei09 |
| <i>Brachymyrmex</i> sp.2                          | -  | 1  | brac02 | <i>Pheidole</i> sp.10                               | 1  | -  | phei10 |
| <i>Camponotus lespesii</i> Forel, 1886            | 4  | 1  | camp1e | <i>Pseudomyrmex flavidulus</i> (Smith, 1858)        | -  | 1  | pseufl |
| <i>Camponotus zenon</i> Forel, 1912               | 10 | 0  | campze | <i>Solenopsis subterranea</i> MacKay & Vinson, 1989 | -  | 1  | solesu |
| <i>Cephalotes pallidicephalus</i> (Smith, 1876)   | -  | -  | cephpa | <i>Solenopsis</i> sp.1                              | 41 | 20 | sole01 |
| <i>Cephalotes pusillus</i> (Klug, 1824)           | -  | -  | cephpu | <i>Solenopsis</i> sp.2                              | 43 | 28 | sole02 |
| <i>Crematogaster nigropilosa</i> Mayr, 1870       | 4  | 1  | cremni | <i>Solenopsis</i> sp.3                              | 12 | 8  | sole03 |
| <i>Cyphomyrmex rimosus</i> (Spinola, 1851)        | 6  | 10 | cyphri | <i>Solenopsis</i> sp.4                              | 40 | 24 | sole04 |
| <i>Gnamptogenys striatula</i> Mayr, 1884          | 21 | 21 | gnamst | <i>Solenopsis</i> sp.5                              | 1  | 1  | sole05 |
| <i>Fulakora elongata</i> (Santschi, 1912)         | 1  | -  | fulael | <i>Solenopsis</i> sp.6                              | 12 | 7  | sole06 |
| <i>Heteroponera dentinodis</i> (Mayr, 1887)       | 1  | 1  | hetede | <i>Solenopsis</i> sp.7                              | -  | 1  | sole07 |
| <i>Heteroponera dolo</i> (Roger, 1860)            | -  | 1  | hetedo | <i>Solenopsis</i> sp.8                              | 7  | 2  | sole08 |
| <i>Hypoconera</i> sp.1                            | -  | 2  | hypo01 | <i>Strumigenys cosmstela</i> Kempf, 1975            | -  | 1  | struco |
| <i>Hypoconera</i> sp.2                            | -  | 1  | hypo02 | <i>Strumigenys denticulata</i> Mayr, 1887           | -  | 6  | strude |
| <i>Hypoconera</i> sp.3                            | -  | 1  | hypo03 | <i>Strumigenys elongata</i> Roger, 1863             | -  | 1  | struel |
| <i>Hypoconera</i> sp.4                            | 1  | -  | hypo04 | <i>Strumigenys splendens</i> (Borgmeyer, 1954)      | -  | 1  | strusp |
| <i>Hylomyrma reitteri</i> (Mayr, 1887)            | 7  | 9  | hylore | <i>Tapinoma atriceps</i> Emery, 1888                | -  | 1  | tapiat |
| <i>Linepithema iniquum</i> (Mayr, 1870)           | 7  | -  | linein | <i>Trachymyrmex</i> sp.1                            | 1  | 1  | trac01 |
| <i>Linepithema leucomelas</i> (Emery, 1894)       | -  | 2  | linele | <i>Wasmannia affinis</i> Santschi, 1929             | 6  | 2  | wasmaf |
| <i>Linepithema micans</i> (Forel, 1908)           | 6  | 1  | linemi | <i>Wasmannia auropunctata</i> (Roger, 1863)         | 16 | 0  | wasmau |
| <i>Linepithema pulex</i> Wild, 2007               | 4  | 1  | linepu | <i>Wasmannia lutzi</i> Forel, 1908                  | -  | 1  | wasmlu |
| <i>Neoponera crenata</i> (Roger, 1861)            | -  | 1  | neopcr | <b>Germany</b>                                      |    |    |        |
| <i>Neoponera villosa</i> (Fabricius, 1804)        | -  | 1  | neopvi | <i>Formica cunicularia</i> (Latreille, 1798)        | 2  | 5  | formcu |
| <i>Nylanderia docilis</i> (Forel, 1908)           | 1  | -  | nylado | <i>Formica fusca</i> Linnaeus, 1758                 | 35 | 41 | formfu |
| <i>Nylanderia</i> sp.1                            | 54 | 23 | nyla01 | <i>Formica rufibarbis</i> Fabricius, 1793           | -  | 1  | formru |
| <i>Octostruma petiolata</i> (Mayr, 1887)          | 2  | 2  | octope | <i>Lasius brunneus</i> (Latreille, 1798)            | 4  | 2  | lasibr |
| <i>Octostruma stenognatha</i> Brown & Kempf, 1960 | -  | 1  | octost | <i>Lasius flavus</i> (Fabricius, 1782)              | -  | 12 | lasifl |
| <i>Octostruma</i> sp.1                            | 1  | 1  | octo01 | <i>Lasius fuliginosus</i> (Latreille, 1798)         | 5  | 5  | lasifu |
| <i>Odontomachus chelifer</i> (Latreille, 1802)    | 20 | 11 | odonch | <i>Lasius niger</i> (Linnaeus, 1758)                | 25 | 26 | lasini |
| <i>Odontomachus meinerti</i> Forel, 1905          | 1  | 1  | odonme | <i>Lasius platythorax</i> Seifert, 1991             | 10 | 10 | lasipl |
| <i>Oxyepoecus plaumanni</i> Kempf, 1974           | -  | 1  | oxyepl | <i>Myrmica lobicornis</i> Nylander, 1846            | 1  | 5  | myrmlo |
| <i>Pachycondyla harpax</i> (Fabricius, 1804)      | 1  | 10 | pachha | <i>Myrmica rubra</i> (Linnaeus, 1758)               | 15 | 22 | myrmrb |
| <i>Pachycondyla striata</i> Smith, 1858           | 43 | 40 | pachst | <i>Myrmica ruginodis</i> Nylander, 1846             | 25 | 16 | myrmrg |
| <i>Pheidole angusta</i> Forel, 1908               | 3  | 1  | pheian | <i>Myrmica rugulosa</i> Nylander, 1849              | 1  | 2  | myrmrl |
| <i>Pheidole aper</i> Forel, 1912                  | 9  | 7  | pheiap | <i>Myrmica scabrinodis</i> Nylander, 1846           | 6  | 17 | myrmrc |
| <i>Pheidole avia</i> Forel, 1908                  | 5  | 2  | pheiav | <i>Stenamma debile</i> (Foerster, 1850)             | -  | 16 | stende |
| <i>Pheidole lucretii</i> Santschi, 1923           | 13 | 8  | pheilu | <i>Temnothorax affinis</i> (Mayr, 1855)             | -  | 2  | temnaf |
| <i>Pheidole nesiota</i> Wilson, 2003              | 19 | 11 | pheine | <i>Temnothorax nylanderi</i> (Foerster, 1850)       | 53 | 52 | temnny |
| <i>Pheidole risii</i> Forel, 1892                 | 4  | 3  | pheiri | <i>Tetramorium caespitum</i> (Linnaeus, 1758)       | -  | 1  | tetrca |
| <i>Pheidole sarcina</i> Forel, 1912               | 11 | 9  | pheisa |                                                     |    |    |        |

IB = incidence in baits (i.e. number of sample points where the species was recorded with this method); IP = incidence in pitfall traps; - = species was not recorded with this method (double "--" means that the species was only recorded by colony sampling).
