# Supplementary material for: Unveiling community patterns and trophic niches of tropical and temperate ants using an integrative framework of field data, stable isotopes and fatty acids
Source: PubMed Central journal article supplement (PMC6109374; doi:10.7717/peerj.5467), 2018-08-22
Supplement: peerj-06-5467-s004.pdf [file peerj-06-5467-s004.pdf]

## SIMPER analysis for ant fatty acids in Brazil and Germany.

NLFAs are ordered by decreasing contribution towards dissimilarity between sites (Bray-Curtis).

Asterisks indicate statistically significant differences.

| NLFA      | Average dissimilarity | SD    | Average/SD ratio | Average % Brazil | Average % Germany | Cumulative contribution | P      |
|-----------|-----------------------|-------|------------------|------------------|-------------------|-------------------------|--------|
| C18:1n9   | 0.210                 | 0.087 | 2.409            | 30.311           | 72.257            | 0.473                   | 0.000* |
| C18:0     | 0.091                 | 0.040 | 2.312            | 23.231           | 5.039             | 0.679                   | 0.000* |
| C16:0     | 0.083                 | 0.053 | 1.558            | 33.075           | 17.810            | 0.866                   | 0.056  |
| C18:2n6   | 0.026                 | 0.022 | 1.185            | 5.919            | 0.808             | 0.924                   | 0.222  |
| C16:1n9   | 0.009                 | 0.007 | 1.346            | 1.182            | 2.047             | 0.944                   | 0.250  |
| C18:2unk1 | 0.006                 | 0.006 | 1.001            | 1.634            | 0.500             | 0.958                   | 0.665  |
| C18:2unk2 | 0.005                 | 0.005 | 0.930            | 1.187            | 0.222             | 0.970                   | 0.590  |
| C18:1n11  | 0.004                 | 0.004 | 1.060            | 1.032            | 0.245             | 0.979                   | 0.211  |
| C14:0     | 0.003                 | 0.002 | 1.556            | 0.875            | 0.474             | 0.985                   | 0.024  |
| C12:0     | 0.002                 | 0.001 | 1.229            | 0.451            | 0.087             | 0.990                   | 0.154  |
| C20:0     | 0.001                 | 0.001 | 1.045            | 0.310            | 0.099             | 0.992                   | 0.746  |
| C17:0     | 0.001                 | 0.001 | 1.316            | 0.373            | 0.256             | 0.995                   | 0.325  |
| C16:1n7   | 0.001                 | 0.002 | 0.393            | 0.194            | 0.091             | 0.997                   | 0.624  |
| C15:0     | 0.001                 | 0.000 | 1.454            | 0.158            | 0.016             | 0.999                   | 0.040* |
| C22:0     | 0.000                 | 0.000 | 1.384            | 0.000            | 0.039             | 0.999                   | 0.000* |
| iC15:0    | 0.000                 | 0.000 | 0.453            | 0.033            | 0.000             | 0.999                   | 1.000  |
| iC17:0    | 0.000                 | 0.000 | 0.360            | 0.016            | 0.000             | 1.000                   | 1.000  |
| C24:0     | 0.000                 | 0.000 | 1.182            | 0.000            | 0.011             | 1.000                   | 0.000* |
| aiC17:0   | 0.000                 | 0.000 | 0.430            | 0.010            | 0.000             | 1.000                   | 1.000  |
| aiC15:0   | 0.000                 | 0.000 | 0.488            | 0.010            | 0.000             | 1.000                   | 1.000  |
