# Supplementary material for: Unveiling community patterns and trophic niches of tropical and temperate ants using an integrative framework of field data, stable isotopes and fatty acids
Source: PubMed Central journal article supplement (PMC6109374; doi:10.7717/peerj.5467), 2018-08-22
Supplement: peerj-06-5467-s005.pdf [file peerj-06-5467-s005.pdf]

## Principal component analysis of ant species × baits in Brazil and Germany.

|                          | PC1   | PC2   | PC3   | PC4   | PC5   | PC6   |
|--------------------------|-------|-------|-------|-------|-------|-------|
| <b>Brazil</b>            |       |       |       |       |       |       |
| Inertia/variance = 4.435 |       |       |       |       |       |       |
| Eigenvalue               | 1.61  | 1.05  | 0.85  | 0.46  | 0.29  | 0.17  |
| % of variance explained  | 36.4  | 23.8  | 19.2  | 10.4  | 6.5   | 4     |
| <b>Germany</b>           |       |       |       |       |       |       |
| Inertia/variance = 3.238 |       |       |       |       |       |       |
| Eigenvalue               | 1.676 | 0.804 | 0.519 | 0.151 | 0.084 | 0.004 |
| % of variance explained  | 51.8  | 24.8  | 16    | 4.7   | 2.6   | 0.1   |

## Regression values of NLFAs with the two first Principal Components in Brazil and Germany.

Asterisks indicate statistically significant differences.

| NLFA          | PC 1  | PC 2  | r <sup>2</sup> | p     | NLFA           | PC 1  | PC 2  | r <sup>2</sup> | p     |
|---------------|-------|-------|----------------|-------|----------------|-------|-------|----------------|-------|
| <b>Brazil</b> |       |       |                |       | <b>Germany</b> |       |       |                |       |
| C12:0         | -0.96 | 0.29  | 0.11           | 0.33  | C12:0          | -0.73 | -0.68 | 0.01           | 0.99  |
| C14:0         | -0.98 | -0.18 | 0.39           | 0.01* | C14:0          | 0.35  | -0.94 | 0.20           | 0.68  |
| iC15:0        | 0.30  | -0.96 | 0.12           | 0.29  | C15:0          | -0.94 | -0.33 | 0.20           | 0.65  |
| aiC15:0       | 0.99  | -0.13 | 0.12           | 0.29  | C16:1n7        | -0.96 | -0.27 | 0.52           | 0.18  |
| C15:0         | -0.07 | -1.00 | 0.11           | 0.34  | C16:1n9        | -0.27 | -0.96 | 0.49           | 0.28  |
| C16:1n7       | 0.18  | -0.98 | 0.19           | 0.15  | C16:0          | 0.18  | -0.98 | 0.18           | 0.74  |
| C16:1n9       | -0.73 | -0.68 | 0.14           | 0.23  | C17:0          | 0.74  | -0.67 | 0.84           | 0.04* |
| C16:0         | -0.41 | 0.91  | 0.26           | 0.06  | C18:2n6        | 0.88  | -0.48 | 0.08           | 0.79  |
| iC17:0        | 0.45  | -0.89 | 0.13           | 0.26  | C18:1n9        | -0.56 | 0.83  | 0.33           | 0.46  |
| aiC17:0       | 0.90  | -0.45 | 0.16           | 0.23  | C18:1n11       | 0.89  | -0.46 | 0.42           | 0.35  |
| C17:0         | 0.79  | -0.62 | 0.09           | 0.42  | C18:0          | 1.00  | 0.07  | 0.78           | 0.05* |
| C18:2n6       | 0.68  | 0.73  | 0.13           | 0.29  | C18:2unk1      | -0.31 | -0.95 | 0.08           | 0.84  |
| C18:1n9       | 0.25  | -0.97 | 0.32           | 0.02* | C18:2unk2      | 0.99  | -0.15 | 0.08           | 0.85  |
| C18:1n11      | -0.15 | -0.99 | 0.09           | 0.39  | C20:0          | 0.99  | -0.12 | 0.23           | 0.60  |
| C18:0         | -0.23 | 0.97  | 0.23           | 0.09  | C22:0          | 0.91  | 0.42  | 0.33           | 0.43  |
| C18:2unk1     | 0.98  | 0.21  | 0.31           | 0.03* | C24:0          | 1.00  | 0.04  | 0.60           | 0.19  |
| C18:2unk2     | 0.97  | 0.25  | 0.22           | 0.09  |                |       |       |                |       |
| C20:0         | 0.58  | -0.81 | 0.14           | 0.23  |                |       |       |                |       |
